Charles D. Collard, M.D., Editor  
 Alan Jay Schwartz, M.D., M.S. Ed., Associate Editor

## Selective Infraclavicular Brachial Plexus Phenol Injection for the Relief of Cancer Pain

Antoun Nader, M.D., Mark C. Kendall, M.D.

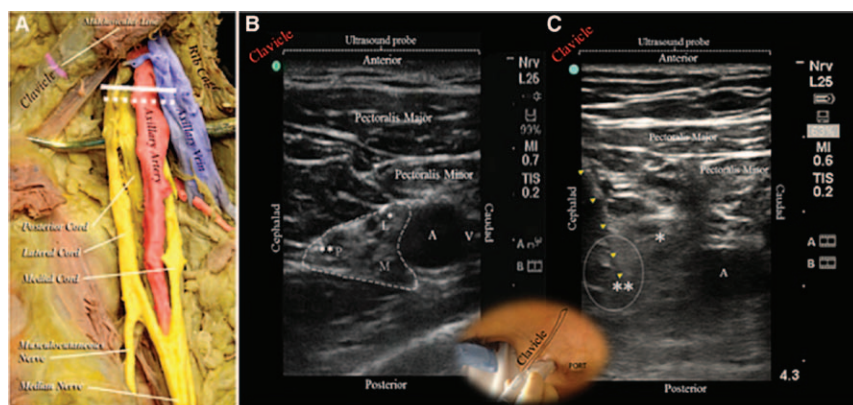

for fig. C).<sup>2</sup> This report illustrates the feasibility of ultrasound localization and targeted phenol injection of the lateral or posterior cords just below the clavicle for palliative pain relief.

A 56-yr-old female with a nonresectable soft-tissue sarcoma in the right biceps muscle presented with burning pain in her upper arm despite methadone and fentanyl patient-controlled analgesia (500 µg q 15 min, 600 µg prn). In the medial infraclavicular region, the transducer was positioned in a sagittal plane perpendicular and caudad to the long axis of the clavicle (Oval inlet). Figure B depicts a typical sonograph of the brachial plexus in a transverse cross-section between the axillary artery and the clavicle beneath the pectorals muscles. To preserve wrist motor function, 5 ml of 6% aqueous phenol was injected in the lateral cord, but resulted in only a 50% reduction in pain (fig. C, asterisk).<sup>3</sup>

An additional injection of 5 ml 6% aqueous phenol targeting the posterior cord (fig. C, double asterisks) produced 100% pain relief with complete loss of upper extremity proprioception and motor function. She was discharged home pain free, and no immediate or short-term complications were reported.

### Acknowledgments

The authors thank Naveen Nathan, M.D., Northwestern University, Feinberg School of Medicine, Chicago, Illinois, for his assistance with image preparation.

### Competing Interests

The authors declare no competing interests.

### Correspondence

Address correspondence to Dr. Kendall: m-kendall@northwestern.edu

### References

1. Akkaya T, Unlu E, Alptekin A, Gumus HI, Umay E, Cakci A: Neurolytic phenol blockade of the obturator nerve for severe adductor spasticity. *Acta Anaesthesiol Scand* 2010; 54:79–85
2. Neal JM, Hebl JR, Gerancher JC, Hogan QH: Brachial plexus anesthesia: Essentials of our current understanding. *Reg Anesth Pain Med* 2002; 27:402–28
3. Orebaugh SL, Groen GJ, Bigeleisen PE: Ultrasound-guided infraclavicular block, *Ultrasound-Guided Regional Anesthesia and Pain Medicine*, 3rd edition. Edited by Bigeleisen PE. Philadelphia, Lippincott Williams & Wilkins, 2012, pp 58–64

From the Department of Anesthesiology, Northwestern University, Feinberg School of Medicine, Chicago, Illinois (A.N., M.C.K.).

Copyright © 2014, the American Society of Anesthesiologists, Inc. Wolters Kluwer Health, Inc. All Rights Reserved. *Anesthesiology* 2015; 122:1153
